# Supplementary material for: Temporal Trends in the Outcomes of Dialysis Patients Admitted With Acute Ischemic Stroke
Source: PubMed Central journal article supplement — J Am Heart Assoc. 2018 Jun 15;7(12):e008686. doi: 10.1161/JAHA.118.008686 (PMC6220547; doi:10.1161/jaha.118.008686), 2018-06-15
Supplement: JAH3-7-e008686-s001.pdf [file JAH3-7-e008686-s001.pdf]

# **SUPPLEMENTAL MATERIAL**

**Table S1. Patient and Hospital Characteristics Included in the Propensity Score Matching.**

|                                         |                                 |
|-----------------------------------------|---------------------------------|
| Age                                     | Blood loss anemia               |
| Race                                    | Iron deficiency anemia          |
| Sex                                     | Paralysis                       |
| Hypertension                            | Neurological disorders          |
| Diabetes mellitus without complications | Hypothyroidism                  |
| Diabetes mellitus with complications    | Liver disease                   |
| Prior Sternotomy                        | AIDS*                           |
| Chronic Pulmonary disease               | Lymphoma                        |
| Atrial fibrillation\flutter             | Deep Venous Thrombosis          |
| Congestive heart failure                | Metastatic disease              |
| Chronic Anticoagulation                 | Solid tumors without metastasis |
| Coagulopathy                            | Collagen vascular disease       |
| Conduction abnormality                  | Weight loss                     |
| Drug Abuse                              | Alcoholism                      |
| Smoking                                 | Depression                      |
| Peripheral vascular disease             | Drug abuse                      |
| Pulmonary hypertension                  | Psychosis                       |
| Obesity                                 | Hospital teaching status        |
| Coronary artery disease                 | Hospital Bed Size               |
| Electrolyte abnormalities               | Rural Location                  |
| Conduction abnormality                  | Region of the Hospital          |
| Coronary artery disease                 | Primary Payer                   |
| Atrial fibrillation\flutter             | Median Household Income         |

\*Acquired immunodeficiency syndrome

**Table S2. International Classification of Diseases, Ninth Revision, Clinical Modification (ICD-9-CM) Codes for Outcomes.**

| <b>Outcome</b>            | <b>Diagnostic or Procedure Codes</b>         |
|---------------------------|----------------------------------------------|
| Intracranial Hemorrhage   | ICD-9-CM (431, 432.9)                        |
| Craniotomy                | ICD-9-CM (01.24, 01.25)                      |
| Blood Transfusion         | CCS procedure (222)                          |
| Gastrointestinal Bleeding | ICD-9-CM (578 to 578.9), CCS procedure (153) |
| Acquired Pneumonia        | CCS procedure (122)                          |
| Sepsis                    | ICD-9-CM (995.91, 996.64, 038, 995.92, 9993) |
| Urinary Tract infection   | ICD-9-CM (5990, 5909)                        |
| Gastrostomy               | ICD-9-CM (4311, 4319)                        |
| Mechanical Ventilation    | ICD-9-CM (672)                               |
| Tracheostomy              | ICD-9-CM (31.1 and 31.2x)                    |

**Table S3. Calculation of Annual AIS Incidence in the Dialysis and non-Dialysis Populations.**

| <b>Calculation of Annual AIS Incidence in the Dialysis Population</b>     |               |               |               |               |               |               |               |               |               |               |               |               |
|---------------------------------------------------------------------------|---------------|---------------|---------------|---------------|---------------|---------------|---------------|---------------|---------------|---------------|---------------|---------------|
| Calendar Year                                                             | 2003          | 2004          | 2005          | 2006          | 2007          | 2008          | 2009          | 2010          | 2011          | 2012          | 2013          | 2014          |
| US Dialysis Patients                                                      | 44851<br>4    | 46703<br>8    | 48590<br>5    | 50663<br>3    | 52670<br>9    | 54775<br>0    | 57041<br>6    | 59265<br>6    | 61241<br>7    | 63391<br>2    | 65685<br>6    | 68032<br>0    |
| US Dialysis Patients with AIS                                             | 6233          | 6079          | 5756          | 5622          | 5812          | 5538          | 5660          | 5450          | 5594          | 4975          | 4845          | 5330          |
| Incidence of AIS per 100,000                                              | 1389.7        | 1301.6        | 1184.6        | 1109.7        | 1103.5        | 1011.0        | 992.3         | 919.6         | 913.4         | 784.8         | 737.6         | 783.5         |
| <b>Calculation of Annual AIS Incidence in the non-Dialysis Population</b> |               |               |               |               |               |               |               |               |               |               |               |               |
| Calendar Year                                                             | 2003          | 2004          | 2005          | 2006          | 2007          | 2008          | 2009          | 2010          | 2011          | 2012          | 2013          | 2014          |
| Non-Dialysis U.S Population                                               | 29011<br>0000 | 29281<br>0000 | 29552<br>0000 | 29838<br>0000 | 30123<br>0000 | 30409<br>0000 | 30677<br>0000 | 30935<br>0000 | 31166<br>0000 | 31400<br>0000 | 31620<br>0000 | 31856<br>0000 |
| Non-Dialysis U.S Population with AIS                                      | 38746<br>7    | 37370<br>1    | 35989<br>2    | 35922<br>5    | 35319<br>6    | 37627<br>4    | 35966<br>6    | 37822<br>3    | 39508<br>3    | 38244<br>0    | 38778<br>5    | 39964<br>0    |
| Incidence of AIS per 100,000                                              | 133.6         | 127.6         | 121.8         | 120.4         | 117.3         | 123.7         | 117.2         | 122.3         | 126.8         | 121.8         | 122.6         | 125.5         |
